Title: Trends in cardiac arrest mortality in the US, 1999-2020

Authors: Karthik Gonuguntla 1 , MD\*; Muchi Ditah Chobufo 1 MD MPH\*; Ayesha Shaik 2 , MD;  
Neel Patel 3 ,MD; Mouna Penmetsa 4 , MD; Harshith Thyagaturu 1 , MD; Amro Taha 5 , MD; Anas  
Alharbi 1 , MD, MS; Yasar Sattar 1 , MD; Sudarshan Balla 1 , MD FSCMR

Affiliations:

1: Division of Cardiology, West Virginia University Heart & Vascular Institute, Morgantown,  
WV, USA

2. Department of Cardiology, Hartford Hospital, Hartford, CT, USA

3. Department of Medicine, New York Medical College/Landmark Medical Center, Woonsocket,  
RI, USA

4. Department of Medicine, University of Connecticut, Farmington, CT, USA

5. Department of Medicine, Weiss Memorial Hospital, Chicago, IL, USA

\* Both authors contributed equally to the project.

Conflict of interest: None

Disclosures: None

Funding: None

Running Title: Trends in mortality rates related to cardiac arrests

Word count: 5567

Corresponding Author:

Karthik Gonuguntla MD

Division of Cardiology

1 Medical Center Drive

West Virginia University, Morgantown WV 26506

Twitter: @KarthikG\_MD

Email: Karthik.gonuguntla@hsc.wvu.edu

Cell: 2244091723

## **Key Points**

### Question

What are the temporal trends on cardiac arrest-related deaths in the United States (U.S.)?

### Findings

In this national cross-sectional study spanning 22 years, there was an overall declining trend in cardiac arrest mortality across all age groups, gender, race, and regions. However, in 2020 there was an increase in the rates of cardiac arrest mortality, likely due to the COVID-19 pandemic.

There was also a state-level variation in cardiac arrest mortality, with certain states showing an increase in mortality rates.

### Meaning

There was an overall reduction in the age-adjusted mortality rates due to cardiac arrest. This decrease in mortality rate was consistent across all genders, races, and US regions. There was also significant racial and sex differences in mortality rates.

## ***Abstract***

**Importance:** Cardiac arrest affects over 600,000 in the US. Despite large-scale public health and educational initiatives, survival rates are lower in certain racial and socioeconomic groups.

**Objective:** To examine the trends in annual rates of cardiac arrests mortality among adults stratified by age, race, and gender in the U.S.

**Design:** A county-level cross-sectional longitudinal study using death data from the Centres for Disease Control and Prevention's (CDC) Wide-Ranging Online Data for Epidemiologic Research (WONDER) database from 1999 to 2020.

**Setting:** Using the multiple causes of death dataset from the CDC's WONDER database, cardiac arrests were identified using the International Classification of Diseases (ICD), tenth revision, clinical modification codes.

**Participants:** Individuals aged 15 years or more whose death was attributed to cardiac arrest.

**Exposures:** Calendar year.

**Main outcomes and measures:** National trends in annual mortality from cardiac arrest in select demographic groups and at the state level.

**Results:** Between 1999 and 2020, the annual cardiac arrest related AAMR (CA-MR) declined through 2019 (132.9 to 89.7 per 100,000 residents, followed by an increase in 2020 (104.5 per 100,000). White patients constituted 82% of all deaths and 51% were female. The overall CA-MR during the study period was 104.48 per 100,000 persons. The CA-MR was higher for men as compared with women (123.5 vs. 89.7 per 100,000) and higher for Black as compared with White adults (154.4 vs. 99.1 per 100,000).

**Conclusion and relevance:**

CA-MR in the overall population has declined, followed by an increase in 2020, which is likely the impact of COVID-19 pandemic. There were also significant racial and sex differences in mortality rates.

**Key Words:** Cardiac arrests, mortality, US, sex differences, age-adjusted mortality, Social determinants of health, racial differences.

**Abbreviations:**

CA: Cardiac arrest; CA-MR: Cardiac arrest related age adjusted mortality rate; CDC: Centers for Disease Control and Prevention; WONDER: Wide-Ranging Online Data for Epidemiologic Research; SVI: Social vulnerability index; NCHS: National Center for Health Statistics Urban-Rural Classification Scheme; SDOH: Social determinants of health; ICD: International Classification of Diseases; AAMR: Age-adjusted mortality rates; APC: Annual percentage change; AAPC: Average annual percentage change; CI: confidence interval; AHA: American heart association; CPR: Cardiopulmonary resuscitation; ACLS: Advanced cardiovascular life support; AED: Automated external defibrillator; EMS: Emergency medical services

## **Introduction**

Cardiac arrest affects over 600,000 in the US<sup>1,2</sup>. The majority are related to an out-of-hospital cardiac arrest (OHCA) which contributes to over 340,000 events per year. Rates of in-hospital cardiac arrest (IHCA) are estimated to be around 292,000 events per year.<sup>2</sup> Previous data have shown a steady decrease in the rates of IHCA, a similar decrease has not been noted in the rates of OHCA<sup>2-5</sup>. Our study extends the results of previously published papers as it incorporates all cardiac arrest death including IHCA and OHCA. We examined the incidence of cardiac arrest mortality per 1000 persons, rather than looking at the case survival rates among those with cardiac arrest. Despite large-scale public health and educational initiatives to train the public to recognize and perform bystander cardiopulmonary resuscitation (CPR), variation in survival rates still exists among racial and socioeconomic groups<sup>6</sup>. It has been reported that the likelihood of survival drops by 7-10% for each minute without CPR, only 25% of OHCA receive bystander CPR, and less than 3% of the U.S. public receives annual CPR training<sup>7</sup>.

Both IHCA and OHCA demonstrate significant overlap in relation to baseline co-morbidities, sex/racial and regional differences<sup>8</sup>. Various changes have been made to the American Heart Association resuscitation guidelines regarding the skills and ability to manage cardiac arrests such as rapid response teams to better manage and standardize CPR, intensive care monitoring, hypothermia protocol, and advanced mechanical circulatory support devices<sup>9</sup>. Prior studies have reported sex- and racial differences in survival at the patient- and neighborhood level from OHCA and IHC<sup>10</sup>. Racial disparities also play a key role in survival rate variations as the racial composition of a community has been shown to influence the likelihood that an individual with an OHCA survives to hospital discharge or has favorable neurological survival<sup>11-13</sup>. Cardiac arrests in a majority of African American communities were less likely to survive discharge compared to the White population<sup>14</sup>. The purpose of our study was to assess the trends of cardiac arrest mortality in the US over 22 years at a population level.

## **Methods**

The Centers for Disease Control and Prevention's Wide-Ranging Online Data for Epidemiologic Research (CDC WONDER) multiple-cause-of-death database was utilized to obtain deaths occurring in the US with cardiac arrest listed as one of the causes of death estimates from January 1999 to December 2020<sup>11,15,16</sup>. We studied cardiac arrests as a contributing or underlying cause of death on nationwide death certificates using the International Statistical Classification of Diseases, Tenth Revision, (ICD-10) code I46 (I46.0, I46.1, I46.9). This data is based on U.S. residents' death certificates, and each death certificate contains a single underlying cause of death, up to 20 additional multiple causes, and sociodemographic data. The underlying cause of death is defined as the "disease or injury which initiated the train of events leading directly to death." When >1 cause or condition is listed on the death certificate, the underlying cause is determined by the sequence of conditions on the certificate, provisions of the ICD, and associated selection rules and modifications. The study was exempt from our institutional review board approval, given the deidentified nature of the database.

Age-adjusted mortality rate (AAMR) and corresponding standard errors for all deaths with cardiac arrests listed as the underlying cause of death were obtained from 1999 to 2020 for the entire U.S. We further stratified the AAMR by age, sex, race/ethnicity, census region, state, and urban-rural classification. Race was categorized as White patients, African American/Black patients, American Indians/Alaska Natives, and Asian/Pacific Islanders. Ethnicity was categorized as Hispanic and non-Hispanic. As mentioned on the death certificates, race, and ethnicity were assessed in accordance with standards from the US Office of Management and Budget.

### **Statistical analysis**

Cardiac arrest-related age-adjusted mortality rates (CA-MR) per 100 000 persons were determined. AAMRs, standard errors (SE), and 95% confidence intervals (CI) were calculated by standardizing CA-related deaths to the corresponding year 2000 U.S population, as previously

described. The Joinpoint regression program (version 4.9.1.0; National Cancer Institute) was used to describe trends in CA-MR<sup>17</sup>. Temporal trends in AAMR were determined by fitting log-linear regression models. We applied Joinpoint segmented regression to identify inflection points in the temporal trends of CA-MR from 1999 to 2020 based on published methodological guidelines<sup>18</sup>. Data points with less than 20 mortality events were flagged unreliable and treated as missing data. For data containing 22-26 time points, the guidelines recommend that the analysis identifies a maximum of 4 joinpoints across the study period. In the current investigation, 22 years were included; therefore, the Joinpoint regression statistical software was set to determine a maximum of 4 joinpoints where significant temporal variation existed in the trend. Best fit models with corresponding joinpoints were suggested by the software. Therefore, zero to a maximum of 4 joinpoints were allowed to be identified. The Grid Search method (2, 2, 0), permutation test, and parametric method were used to estimate average annual percent change (APC) and 95% confidence intervals (CIs). The average annual percent change over 22 years was then calculated using a weighted average of the slope coefficients of the underlying joinpoint regression line with weights equal to the length of each segment divided by 22. AAPC was considered increasing or decreasing if the slope describing the change in age-adjusted mortality was significantly different from 0 using 2-tailed t testing with p values <0.05 considered statistically significant.

## **Results**

The CA related deaths between 1999-2020 were 7,710,211 in the entire US. Of these, 49% were males, and 51% were women. The majority were White patients (82%), and Black patients constituted 14% of the overall cohort. The overall CA-MR during the study duration was 104.48 per 100 000.

AAMR was higher for males compared with females (123.49 per 100,000 persons vs 89.66 per 100,000 persons) and higher for Black adults compared to White patients (154.41 per 100,000 persons vs 99.13 per 100,000 persons, respectively). Upon further stratifying race and gender,

AAMR was highest in Black males (182.16 per 100,000 persons) followed by Black females (135.22 per 100,000 persons), White males (117.65 per 100,000 persons), and White females (80.78 per 100,000 persons) respectively. The overall CA-MR decreased from 132.86 per 100,000 persons in 1999 to 89.67 per 100,000 persons in 2019 followed by an increase in 2020 to 104.48 per 100,000 persons. AAMR in all races and sex has trended down from 1999 to 2019 with an increase in AAMR in 2020 (Figure 1a, 1b). Among White females, AAMR decreased from 1999 to 2007 (APC, -3.3% [95% CI, -3.7 to -2.9]) and 2007 to 2018 (APC, -0.9% [95% CI, -1.1 to 0.6]) with a significant increase from 2018 to 2020 (APC, 4.7% [95% CI, 1.1 to 8.4]), overall (APC, -1.3% [95% CI, -1.7 to 0.9]). Among Black females, AAMR decreased from 1999 to 2018 (APC, -2.4% [95% CI, -2.6 to -2.3]) followed by a rise between 2018 and 2020 (APC, 8.7% [95% CI, 3.2-14.5]). Among Black males, AAMR decreased from 1999 to 2018 (APC, -2.2% [95% CI, -2.4 to -2.0]) followed by a rise between 2018 and 2020 (APC, 11.7% [95% CI, 4.3-19.7]). Among White males, there was a steady decrease in the AAMR from 1999 to 2009 (APC, -2.8% [95% CI, -3.4 to -2.3]) followed by another slow decline from 2009 and 2020 (APC, -0.6% [95% CI, -1.1 to -0.1]).

The four geographic regions in the US showed similar trends in AAMR between 1999 and 2020. AAMR in Northeast decreased from 188.24 per 100,000 persons in 1999 to 117.61 per 100,000 persons in 2019, with an increase to 142.6 per 100,000 persons in 2020. AAMR in the Midwest decreased from 72.69 per 100,000 persons in 1999 to 62.59 per 100,000 persons in 2019, with an increase to 70.39 per 100,000 persons in 2020. AAMR in the Southern region decreased from 128.08 per 100,000 persons in 1999 to 75.78 per 100,000 persons in 2019, with an increase to 86.22 per 100,000 persons in 2020, and in the West, it decreased from 155.69 per 100,000 persons in 1999 to 115.03 per 100,000 persons in 2019, with an increase to 135.29 per 100,000 persons in 2020. (Figure 1c). We also noted significant differences within a region in regard to CA-MR. States with the highest AAMR included(per 100,000 persons): New York 254.83, Mississippi 218.3, Georgia 195.4, California 187.95, Nevada 178.94, Connecticut 169.7, Alabama



143.47, Hawaii 142.55, Nebraska 132.93, West Virginia 115.43, Massachusetts 105.07. (Figure 2). There was significant state-wide variation in the CA-MR over 22 years. The majority of the states showed an overall decrease in AAMR from 1999-2020 [Maine (-5.8), District of Columbia (-4.9), Hawaii (-5.2), West Virginia (-5.2), Nebraska (-4.1), Florida (-3.2), Georgia (-3), New York (-2.8), Vermont (-2.5), Missouri (-2.4), Tennessee (-2.3), Kentucky (-1.9), Connecticut (-1.8), North Carolina (-1.8), Texas (-1.7), New Mexico (-1.5), Ohio (-1.1), California (-1), Pennsylvania (-0.8)]. However, certain states had an overall increase in AAMR [New Jersey (3.7), Arkansas (2.8), Oregon (2.4), Illinois (1.9), Minnesota (1.4), Michigan (1.3)]. (Figure 3). Data regarding AAMR across all races, genders, states, and regions, as well as the Joinpoint analyses, are presented in Supplement files.

## **Discussion**

We analyzed over 20 years of data using the CDC wonder database to assess the age-adjusted mortality rate among patients with cardiac arrest from 1999 to 2020 in the U.S. The principal findings in our study include:

- 1) There was an overall reduction in the age-adjusted mortality rates due to cardiac arrest. This decrease in mortality rate was consistent across all genders, races, and US regions.
- 2) Although there was a significant decrease in the mortality rates over time in the four US regions, a state-level variation was noted, with certain states showing an increase in mortality rates.
- 3) In the year 2020, a reversal in trend with an increase in the rates of cardiac arrest across all demographic subgroups was noted, likely secondary to the COVID-19 pandemic.

We report a favorable downward trend in CA-MR during the study period in the overall population and across age groups, various ethnic groups, and different regions. The downtrend in CA-related deaths could be from multiple factors. First, the incidence of myocardial infarctions (MI) has trended lower in recent years<sup>19</sup>. The decline in AMI was due to the dramatic decrease in the incidence of ST elevation MI, while the incidence of Non-ST Elevation MI may have increased. ST elevation MI is associated with significant scar burden compared to Non-ST Elevation MI.<sup>20</sup> The time-sensitive care and interventions in AMI management also play a significant role. Myocardial scar serves as a typical substrate for ventricular arrhythmia leading to cardiac arrest. The decline in AMI is largely due to improved preventive care with increasing use of statins and modification of cardiovascular risk factors. The other etiologies for CA, such as channelopathies and non-ischemic cardiomyopathies, are unlikely to have seen a decline as they have a genetic component. Second, improvements in the chain of survival with high-quality CPR and also bystander CPR could also contribute to a decline in deaths during the time period. Indeed, Chan et al reported improved survival in OHCA in an analysis from a prospective registry from the US<sup>21</sup>. The improved survival was attributed to both improved pre-hospital and in-hospital survival. Third, newer American heart association (AHA) resuscitation guidelines focusing on in-hospital cardiac arrest patients' care to better manage and standardize advanced cardiovascular life support (ACLS). It has led to improved post-resuscitation care such as therapeutic hypothermia, early percutaneous coronary intervention, and advanced critical care support.

Consistent with prior studies, women had significantly lower CA-MR compared to men.<sup>3</sup> The possible explanations for this difference are women have cardioprotective factors that could potentially favor lesser mortality rates from CA than men. Women also have a higher studied likelihood of return of spontaneous circulation compared to men, and at baseline females tend to develop coronary artery disease (CAD) 10-15 years later than men<sup>22,23</sup>. The overall lifetime

risk of sudden cardiac death (SCD) for men is 10.9% for men while it is 2.8% for women, and while the incidence of SCD increases with age for both males and females, a 2:1 ratio has been shown to exist between males and females across all ages. Furthermore, the proportion of SCD due to CAD remains lower in women, with an estimated 45%–50% versus 80%–90% in men<sup>24</sup>. While women may differ in baseline risk factors for having a CA, gender disparities amongst bystander CPR rates continue to suggest that further improvement in basic life support educational materials and training can be made, such as with the incorporation of female models. Studies have further suggested that public concern about legal, and cultural consequences, and hesitation with applying CPR skills to female anatomy were common sex-specific concerns.<sup>25</sup> Studies across different countries such as Sweden, Denmark, Netherlands, Japan, and the United States have shown women are less likely than men to receive bystander CPR<sup>24</sup>. This is further supported by studies that show males have an increased likelihood of receiving bystander CPR than females in public locations, but when at home where lay responders are mostly family members, gender disparities for bystander CPR delivery were not seen<sup>26</sup>.

Previous studies analyzed the association of race and socioeconomic status with mortality from cardiac arrest.<sup>11,14,27,28</sup> Racial differences in the incidence and outcomes of cardiac arrest are well described.<sup>11,28,29</sup> Our study extends the observations of those prior studies reporting higher mortality rates in the African-American race compared to the White race. Data from the CPR Chicago project shows a higher incidence of CA and poor rates of survival in Black patients compared to White patients.<sup>30</sup> The study reported that Black patients were less likely to have witnessed cardiac arrest, bystander-initiated CPR, or an initial shockable rhythm or to be admitted to the hospital. The odds of survival are higher for witnessed CA as there is a higher likelihood of early recognition and bystander CPR<sup>31</sup>. There is long-standing and unequivocal evidence of low rates of bystander CPR in Black patients and even adjusted for neighborhood

income and location of CA, partly attributable to explicit and implicit bias<sup>28</sup>. Similar rates of limited bystander CPR initiation have also been seen amongst Latino and non-English speaking neighborhoods<sup>32</sup>. Multiple studies have also shown lower rates of shockable rhythm in Black patients<sup>11,28</sup>. The relative contribution of differences in underlying comorbidities, genetic predisposition, or degeneration of shockable rhythm due to delay in intervention to the identified disparities remains to be seen. Further compounding the racial disparities is the allocation of resources in the Black/Hispanic predominant neighborhoods. Previous studies have shown a correlation between counties with higher African American and Hispanic residents and lower rates of CPR training<sup>33,34</sup>. Lower county-level rates of CPR training may, in part, contribute to lower rates of bystander CPR, lower rates of OHCA survival, and increased mortality from CA. Education about the recognition of cardiac arrest and population-based CPR training are community-level interventions that improve outcomes of CA, irrespective of race<sup>35</sup>. However, despite an improved rate of bystander interventions with community-level initiatives, Moeller et al reported improved survival only in White patients and not Black patients<sup>32</sup>. The entire chain of survival needs to be examined to identify the modifiable factors both at the prehospital level as well as the intra-hospital level to resolve racial disparities.

The Northeast had a higher CA-MR followed by the West, South, and Midwest. An interesting finding noted was that the AAMR dropped in the Midwest till 2007 followed by an increase in MR which is different from other regions as they showed a uniform decrease in the AAMR over 20 years. AAMR went up in 2020 across all regions except the South which could possibly be related to the delayed COVID outbreak in the Southern regions<sup>36</sup>. There were significant regional differences in the burden of CA-MR and states which were in the upper 90<sup>th</sup> percentile of cardiac arrest were New York, Mississippi, Georgia, California, Nevada, Connecticut, Alabama, Hawaii, Nebraska, West Virginia, and Massachusetts. The potential explanation as to why regions with high population density, such as in the Northeast and West have higher CA-MR

could be due to longer response time and delay in CPR initiation, lack of early defibrillation, and longer transportation time to the hospital<sup>35</sup>. Not only EMS operations but factors beyond the field such as healthcare setup/provider distribution plays a key component. Baseline patient's cardiovascular health risk factors such as obesity, smoking, diet, diabetes, and substance use also show substantial variability across the United States and can contribute to CA-MR<sup>37</sup>. Limited resource availability, from either geographic spacing or population density, baseline variability in cardiovascular risk factors, and variation in CPR education rates are areas that require further public health investigation to mitigate CA care gaps. Following a steady decline in CA-MR from 1999 to 2019, a reversal in trend with an increase in AAMR was seen in 2020, consistent across sex, racial, and geographic subgroups. A similar reversal of the trend with increased mortality due to cardiovascular diseases in 2020 has been reported<sup>38</sup>. This trend correlates with the start of the COVID-19 pandemic and the resultant unprecedented strain on healthcare and emergency response systems. Chan et al. reported an increased incidence of CA during the pandemic, with a significant increase in counties most affected by COVID-19. Compared to the pre-COVID-19 pandemic phase, the pandemic period was associated with a lower likelihood of sustained ROSC after an OHCA, a higher likelihood of termination of CPR in the field, lower survival rates to discharge from CA, and less favorable neurological recovery compared to the pre-COVID-19 period<sup>39-41</sup>.

### **Limitations**

Even though the CDC WONDER is a large database, there are some limitations to the study due to shortcomings of the database. The dataset is obtained from death certificates and relies on the accuracy of data in the death certificate. The data is obtained exclusively from death reports and does not include information about co-morbidities, prior medical and surgical history, medications, vital signs, laboratory information, treatment, and information about CPR and AED utilization. Causes of death are listed using ICD coding which are susceptible to coding errors. We performed a retrospective cross-sectional analysis, so we were not able to prove causal

relationships between county-level characteristics and mortality. Individual risk factors cannot be examined, so we performed crude estimates of AAMR. The database provides us with aggregated data and not individual-level data which limits our ability to perform adjusted analyses. To control these limitations, we performed a subgroup analysis looking at demographic and population-level variables. A considerable number of OHCA can go unassessed, so the likely cardiac arrest burden is significantly higher. Cardiac arrest in our cohort includes both out-of-hospital and in-hospital cardiac arrest. The etiology of cardiac arrest- traumatic vs. non-traumatic cannot be discerned.

## **Conclusion**

We report improvements in AAMR due to cardiac arrest in the overall US population and across most demographic groups with higher mortality rates in the Black population. A multi-dimensional approach with an emphasis on social determinants of health could allow for targeted interventions to address the increased AAMR due to CA in vulnerable groups.

## **Figures and tables legends:**

**Figure 1a:** Trends in cardiac arrests related mortality by race.

**Figure 1b:** Trends in cardiac arrests related mortality by sex

**Figure 1c:** Trends in cardiac arrests related mortality by US regions

**Figure 2:** Map showing state-level cardiac arrests related age-adjusted mortality rates in the US.

**Figure 3:** Map showing state-wise AAMR trend over 22 years.

**Visual Abstract :**

Visual representation of cardiac arrest-related mortality and the impact of social vulnerability index on mortality rates<sup>42</sup>

1. Tsao CW, Aday AW, Almarzooq ZI, Alonso A, Beaton AZ, Bittencourt MS, Boehme AK, Buxton AE, Carson AP, Commodore-Mensah Y, et al. Heart Disease and Stroke Statistics—2022 Update: A Report From the American Heart Association. *Circulation*. 2022;145:e153-e639. doi: doi:10.1161/CIR.0000000000001052
2. Virani SS, Alonso A, Benjamin EJ, Bittencourt MS, Callaway CW, Carson AP, Chamberlain AM, Chang AR, Cheng S, Delling FN, et al. Heart Disease and Stroke Statistics-2020 Update: A Report From the American Heart Association. *Circulation*. 2020;141:e139-e596. doi: 10.1161/cir.0000000000000757
3. Girotra S, Nallamothu BK, Spertus JA, Li Y, Krumholz HM, Chan PS. Trends in survival after in-hospital cardiac arrest. *N Engl J Med*. 2012;367:1912-1920. doi: 10.1056/NEJMoa1109148
4. Merchant RM, Topjian AA, Panchal AR, Cheng A, Aziz K, Berg KM, Lavonas EJ, Magid DJ. Part 1: Executive Summary: 2020 American Heart Association Guidelines for Cardiopulmonary Resuscitation and Emergency Cardiovascular Care. *Circulation*. 2020;142:S337-s357. doi: 10.1161/cir.0000000000000918
5. Uber A, Sadler RC, Chassee T, Reynolds JC. Bystander Cardiopulmonary Resuscitation Is Clustered and Associated With Neighborhood Socioeconomic Characteristics: A Geospatial Analysis of Kent County, Michigan. *Acad Emerg Med*. 2017;24:930-939. doi: 10.1111/acem.13222
6. Huebinger R, Vithalani V, Osborn L, Decker C, Jarvis J, Dickson R, Escott M, White L, Al-Araji R, Nikonowicz P, et al. Community disparities in out of hospital cardiac arrest

care and outcomes in Texas. *Resuscitation*. 2021;163:101-107. doi:

10.1016/j.resuscitation.2021.03.021

7. Mitchell MJ, Stubbs BA, Eisenberg MS. Socioeconomic status is associated with provision of bystander cardiopulmonary resuscitation. *Prehosp Emerg Care*.

2009;13:478-486. doi: 10.1080/10903120903144833

8. Sasson C, Magid DJ, Chan P, Root ED, McNally BF, Kellermann AL, Haukoos JS.

Association of neighborhood characteristics with bystander-initiated CPR. *N Engl J Med*.

2012;367:1607-1615. doi: 10.1056/NEJMoa1110700

9. Neumar RW, Shuster M, Callaway CW, Gent LM, Atkins DL, Bhanji F, Brooks SC,

de Caen AR, Donnino MW, Ferrer JM, et al. Part 1: Executive Summary: 2015 American

Heart Association Guidelines Update for Cardiopulmonary Resuscitation and Emergency

Cardiovascular Care. *Circulation*. 2015;132:S315-367. doi:

10.1161/cir.0000000000000252

10. Nagraj S, Varrias D, Kharawala A, Mathai SV, Seo J, Narvel H, Li W, Kokkinidis DG,

Barakakis PA, Tzoumas A, et al. Ethnic and sex-based differences in outcomes after out-

of-hospital cardiac arrest: a glimpse of the largest municipal healthcare system in the

United States. *Cardiovasc Diagn Ther*. 2023;13:1-10. doi: 10.21037/cdt-22-371

11. Chan PS, McNally B, Vellano K, Tang Y, Spertus JA. Association of Neighborhood

Race and Income With Survival After Out-of-Hospital Cardiac Arrest. *J Am Heart Assoc*.

2020;9:e014178. doi: 10.1161/jaha.119.014178

12. Shah KS, Shah AS, Bhopal R. Systematic review and meta-analysis of out-of-

hospital cardiac arrest and race or ethnicity: Black US populations fare worse. *Eur J Prev*

*Cardiol*. 2014;21:619-638. doi: 10.1177/2047487312451815

13. Toy J, Bosson N, Schlesinger S, Gausche-Hill M. Racial and ethnic disparities in

the provision of bystander CPR after witnessed out-of-hospital cardiac arrest in the

United States. *Resuscitation*. 2023;190:109901. doi:

10.1016/j.resuscitation.2023.109901



14. Root ED, Gonzales L, Persse DE, Hinchey PR, McNally B, Sasson C. A tale of two cities: the role of neighborhood socioeconomic status in spatial clustering of bystander CPR in Austin and Houston. *Resuscitation*. 2013;84:752-759. doi: 10.1016/j.resuscitation.2013.01.007
15. Gaddam S, Singh S. Socioeconomic disparities in prehospital cardiac arrest outcomes: An analysis of the NEMESIS database. *Am J Emerg Med*. 2020;38:2007-2010. doi: 10.1016/j.ajem.2020.06.045
16. Justice JM, Holley JE, Brady MF, Walker JR. Association of race and socioeconomic status with the rate of bystander-initiated CPR in Memphis. *J Am Coll Emerg Physicians Open*. 2020;1:440-444. doi: 10.1002/emp2.12095
17. Multiple Cause of Death, 1999-2020. <https://wonder.cdc.gov/mcd-icd10.html>. Accessed June 30, 2023.
18. Anderson RN, Rosenberg HM. Age standardization of death rates: implementation of the year 2000 standard. *Natl Vital Stat Rep*. 1998;47:1-16, 20.
19. Friede A, Reid JA, Ory HW. CDC WONDER: a comprehensive on-line public health information system of the Centers for Disease Control and Prevention. *Am J Public Health*. 1993;83:1289-1294. doi: 10.2105/ajph.83.9.1289
20. Joinpoint Regression Program. <https://surveillance.cancer.gov/joinpoint/>. Accessed July 8.
21. Number of Joinpoints — Joinpoint Help System. .
22. Lei H, Hu J, Liu L, Xu D. Sex differences in survival after out-of-hospital cardiac arrest: a meta-analysis. *Critical Care*. 2020;24:613. doi: 10.1186/s13054-020-03331-5
23. Mody P, Pandey A, Slutsky AS, Segar MW, Kiss A, Dorian P, Parsons J, Scales DC, Rac VE, Cheskes S, et al. Gender-Based Differences in Outcomes Among Resuscitated Patients With Out-of-Hospital Cardiac Arrest. *Circulation*. 2021;143:641-649. doi: 10.1161/CIRCULATIONAHA.120.050427

24. Butters A, Arnott C, Sweeting J, Winkel BG, Semsarian C, Ingles J. Sex Disparities in Sudden Cardiac Death. *Circulation: Arrhythmia and Electrophysiology*. 2021;14:e009834. doi: doi:10.1161/CIRCEP.121.009834
25. Perman SM, Shelton SK, Knoepke C, Rappaport K, Matlock DD, Adelgais K, Havranek EP, Daugherty SL. Public Perceptions on Why Women Receive Less Bystander Cardiopulmonary Resuscitation Than Men in Out-of-Hospital Cardiac Arrest. *Circulation*. 2019;139:1060-1068. doi: doi:10.1161/CIRCULATIONAHA.118.037692
26. Blewer AL, McGovern SK, Schmicker RH, May S, Morrison LJ, Aufderheide TP, Daya M, Idris AH, Callaway CW, Kudenchuk PJ, et al. Gender Disparities Among Adult Recipients of Bystander Cardiopulmonary Resuscitation in the Public. *Circ Cardiovasc Qual Outcomes*. 2018;11:e004710. doi: 10.1161/circoutcomes.118.004710
27. Yeh RW, Sidney S, Chandra M, Sorel M, Selby JV, Go AS. Population trends in the incidence and outcomes of acute myocardial infarction. *N Engl J Med*. 2010;362:2155-2165. doi: 10.1056/NEJMoa0908610
28. Plein S, Younger JF, Sparrow P, Ridgway JP, Ball SG, Greenwood JP. Cardiovascular magnetic resonance of scar and ischemia burden early after acute ST elevation and non-ST elevation myocardial infarction. *J Cardiovasc Magn Reson*. 2008;10:47. doi: 10.1186/1532-429x-10-47
29. Chan PS, Krumholz HM, Nichol G, Nallamothu BK. Delayed time to defibrillation after in-hospital cardiac arrest. *N Engl J Med*. 2008;358:9-17. doi: 10.1056/NEJMoa0706467
30. Reinier K, Rusinaru C, Chugh SS. Race, ethnicity, and the risk of sudden death<sup></sup>. *Trends Cardiovasc Med*. 2019;29:120-126. doi: 10.1016/j.tcm.2018.07.001
31. Garcia RA, Spertus JA, Girotra S, Nallamothu BK, Kennedy KF, McNally BF, Breathett K, Del Rios M, Sasson C, Chan PS. Racial and Ethnic Differences in Bystander CPR for Witnessed Cardiac Arrest. *N Engl J Med*. 2022;387:1569-1578. doi: 10.1056/NEJMoa2200798

32. Moeller S, Hansen CM, Kragholm K, Dupre ME, Sasson C, Pearson DA, Tyson C, Jollis JG, Monk L, Starks MA, et al. Race Differences in Interventions and Survival After Out-of-Hospital Cardiac Arrest in North Carolina, 2010 to 2014. *J Am Heart Assoc.* 2021;10:e019082. doi: 10.1161/jaha.120.019082
33. Out-of-Hospital Cardiac Arrest Surveillance --- Cardiac Arrest Registry to Enhance Survival (CARES), United States, October 1, 2005--December 31, 2010.
34. Swor R, Khan I, Domeier R, Honeycutt L, Chu K, Compton S. CPR training and CPR performance: do CPR-trained bystanders perform CPR? *Acad Emerg Med.* 2006;13:596-601. doi: 10.1197/j.aem.2005.12.021
35. Chocron R, Loeb T, Lamhaut L, Jost D, Adnet F, Lecarpentier E, Bougouin W, Beganton F, Juvin P, Marijon E, et al. Ambulance Density and Outcomes After Out-of-Hospital Cardiac Arrest. *Circulation.* 2019;139:1262-1271. doi: 10.1161/circulationaha.118.035113
36. The National Respiratory and Enteric Virus Surveillance System (NREVSS). doi: <https://www.cdc.gov/surveillance/nrevss/index.html>
37. Parcha V, Kalra R, Suri SS, Malla G, Wang TJ, Arora G, Arora P. Geographic Variation in Cardiovascular Health Among American Adults. *Mayo Clin Proc.* 2021;96:1770-1781. doi: 10.1016/j.mayocp.2020.12.034
38. Malta Hansen C, Kragholm K, Pearson DA, Tyson C, Monk L, Myers B, Nelson D, Dupre ME, Fosbøl EL, Jollis JG, et al. Association of Bystander and First-Responder Intervention With Survival After Out-of-Hospital Cardiac Arrest in North Carolina, 2010-2013. *Jama.* 2015;314:255-264. doi: 10.1001/jama.2015.7938
39. Cushman M, Shay CM, Howard VJ, Jiménez MC, Lewey J, McSweeney JC, Newby LK, Poudel R, Reynolds HR, Rexrode KM, et al. Ten-Year Differences in Women's Awareness Related to Coronary Heart Disease: Results of the 2019 American Heart Association National Survey: A Special Report From the American Heart Association. *Circulation.* 2021;143:e239-e248. doi: doi:10.1161/CIR.0000000000000907

40. Patel A, Fang J, Gillespie C, Odom E, King SC, Luncheon C, Ayala C. Awareness of Stroke Signs and Symptoms and Calling 9-1-1 Among US Adults: National Health Interview Survey, 2009 and 2014. *Prev Chronic Dis*. 2019;16:E78. doi: 10.5888/pcd16.180564
41. Mahajan S, Valero-Elizondo J, Khera R, Desai NR, Blankstein R, Blaha MJ, Virani SS, Kash BA, Zoghbi WA, Krumholz HM, et al. Variation and Disparities in Awareness of Myocardial Infarction Symptoms Among Adults in the United States. *JAMA Network Open*. 2019;2:e1917885-e1917885. doi: 10.1001/jamanetworkopen.2019.17885
42. Created using BioRender.com

Trends in AAMR following cardiac arrest by Race: 1999 - 2020

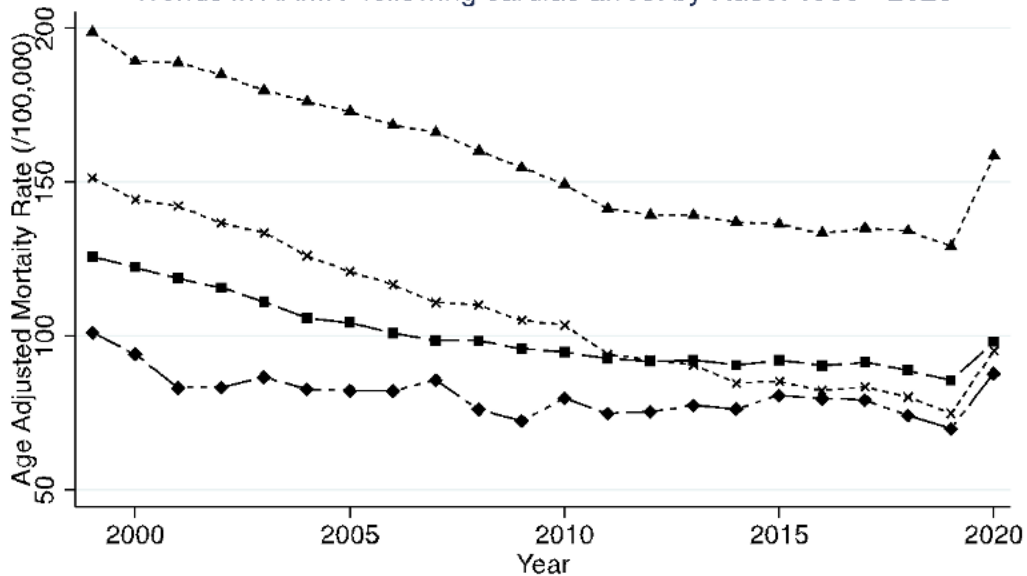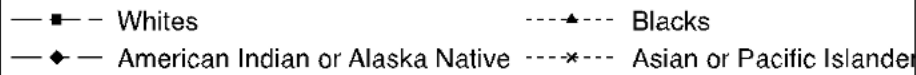

Trends in CA mortality by Gender in the USA: 1999 - 2020

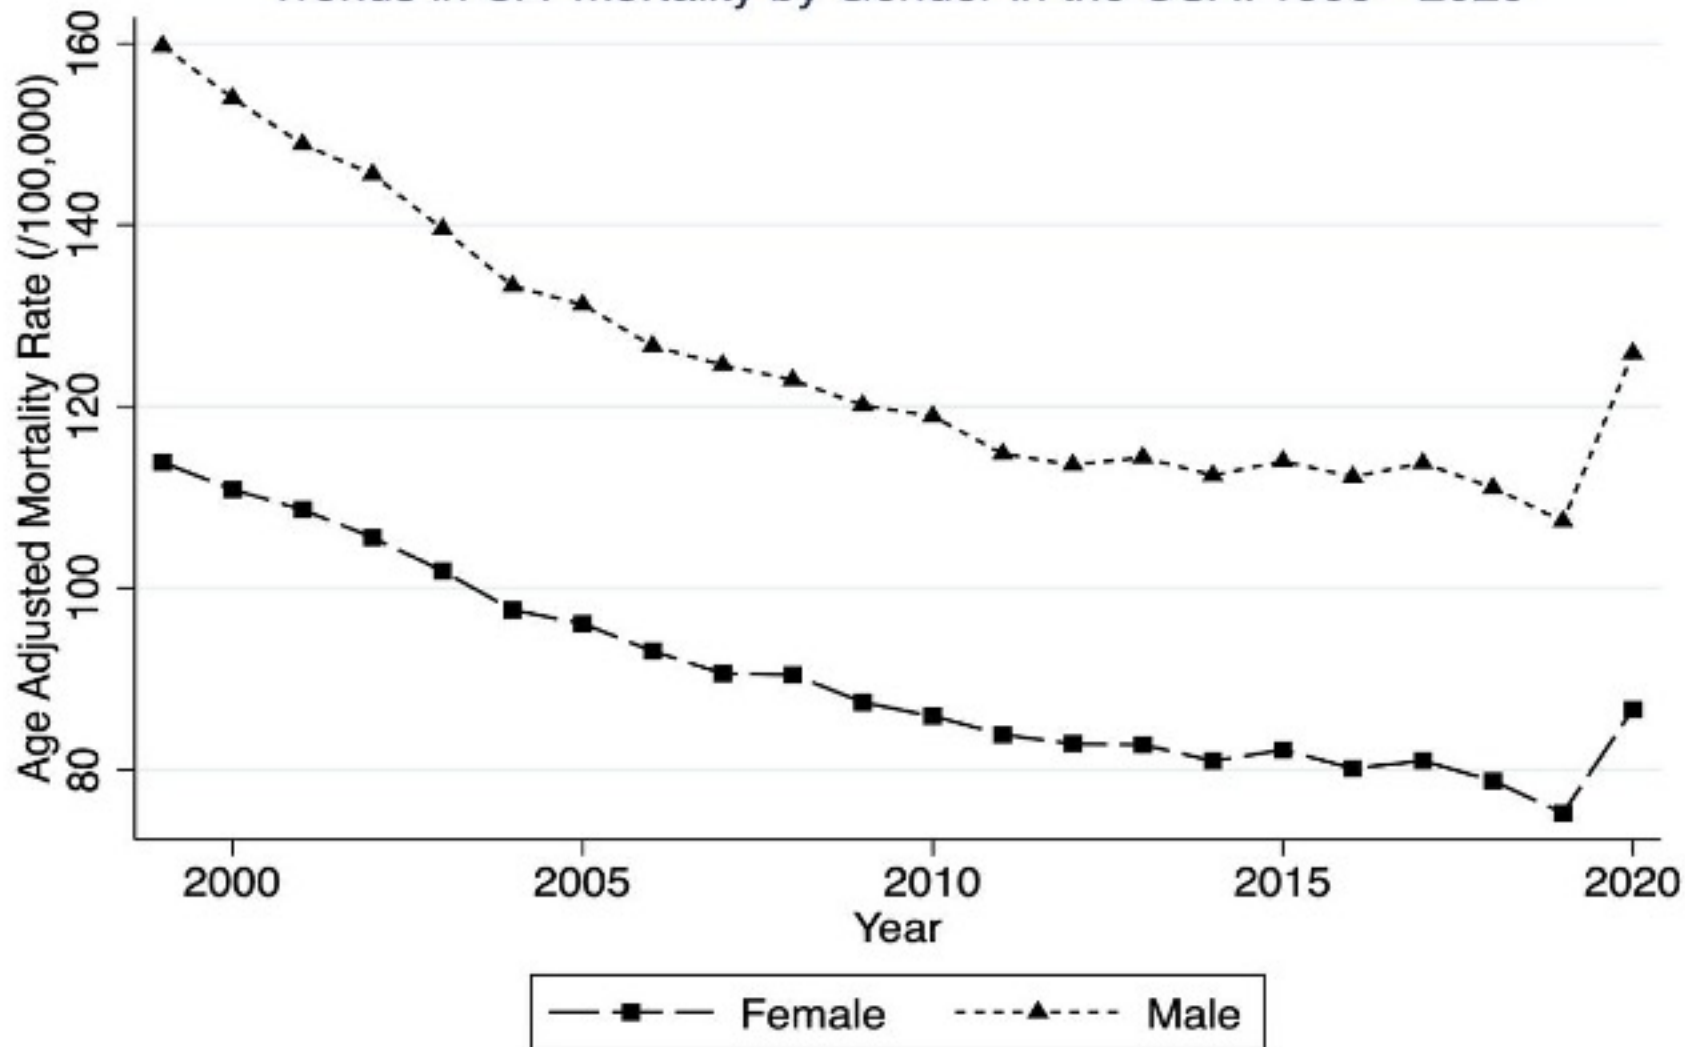

Trends in CA AAMR by Census track in the USA: 1999 - 2020

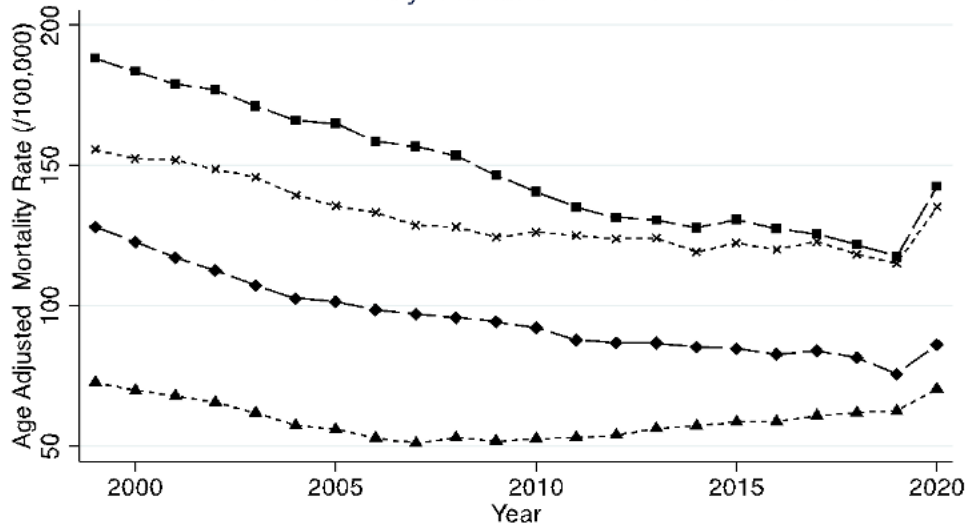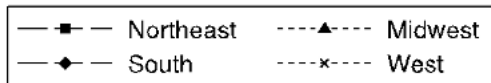

# Map showing state level age adjusted mortality rates following cardiac arrest in the USA: 1999 - 2020

Age Adjusted Mortality Rate (AAMR) per 100,000 population

24.8  254.8

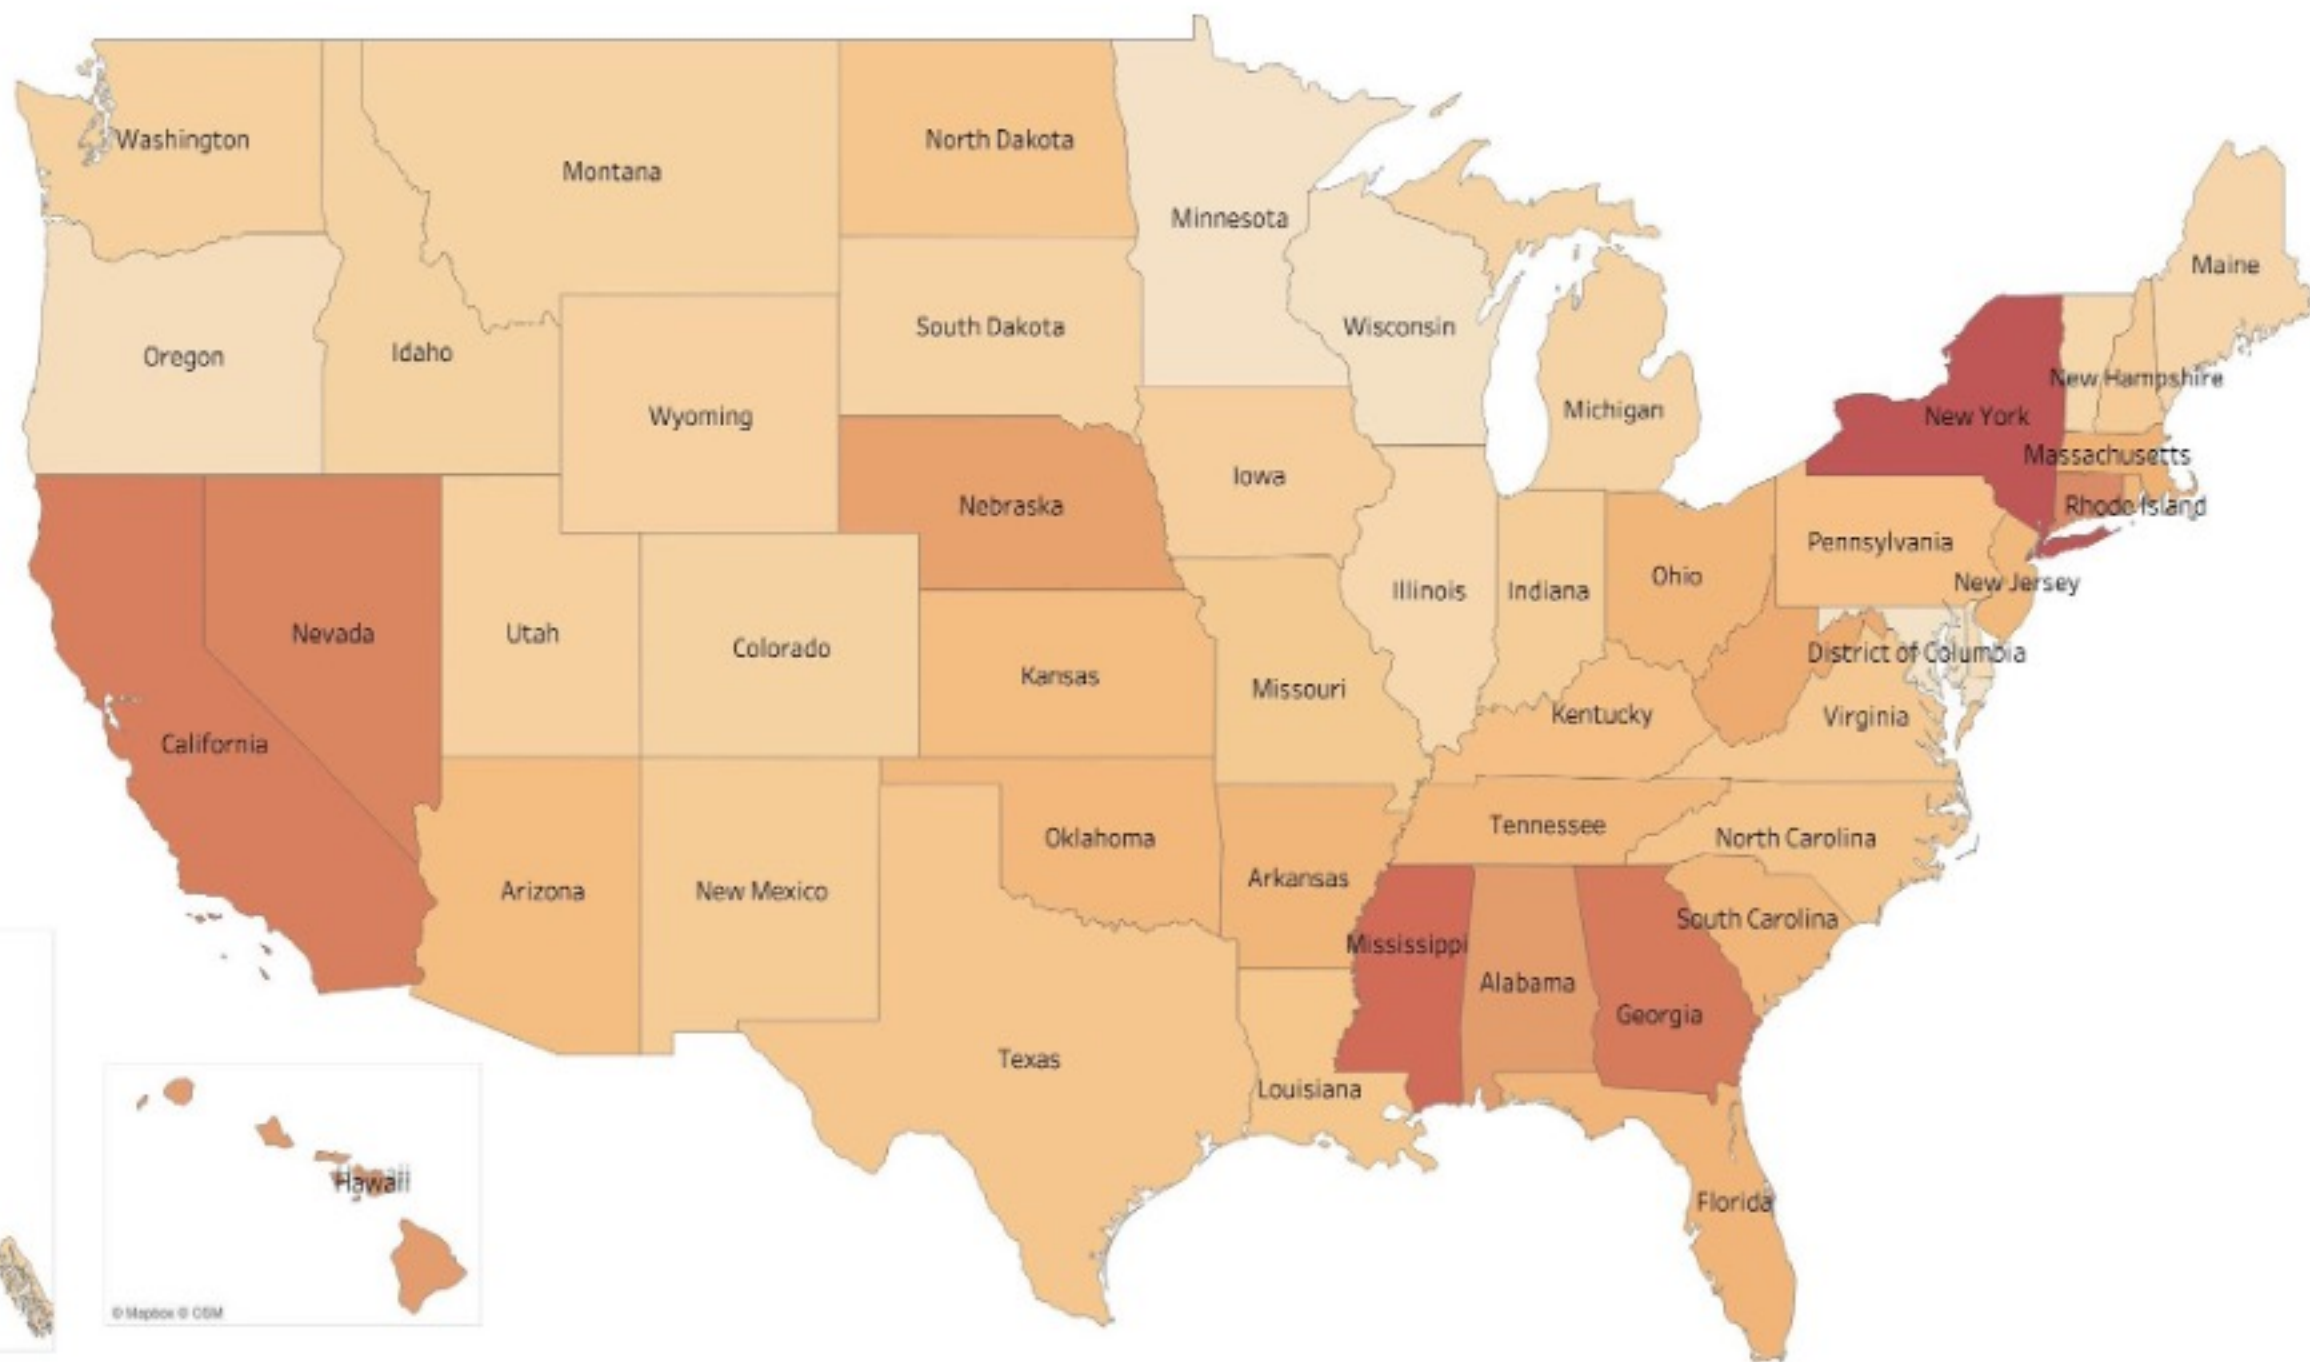



medRxiv preprint doi: <https://doi.org/10.1101/2023.08.01.23293526>; this version posted August 2, 2023. The copyright holder for this preprint (which was not certified by peer review) is the author/funder, who has granted medRxiv a license to display the preprint in perpetuity. All rights reserved. No reuse allowed without permission.

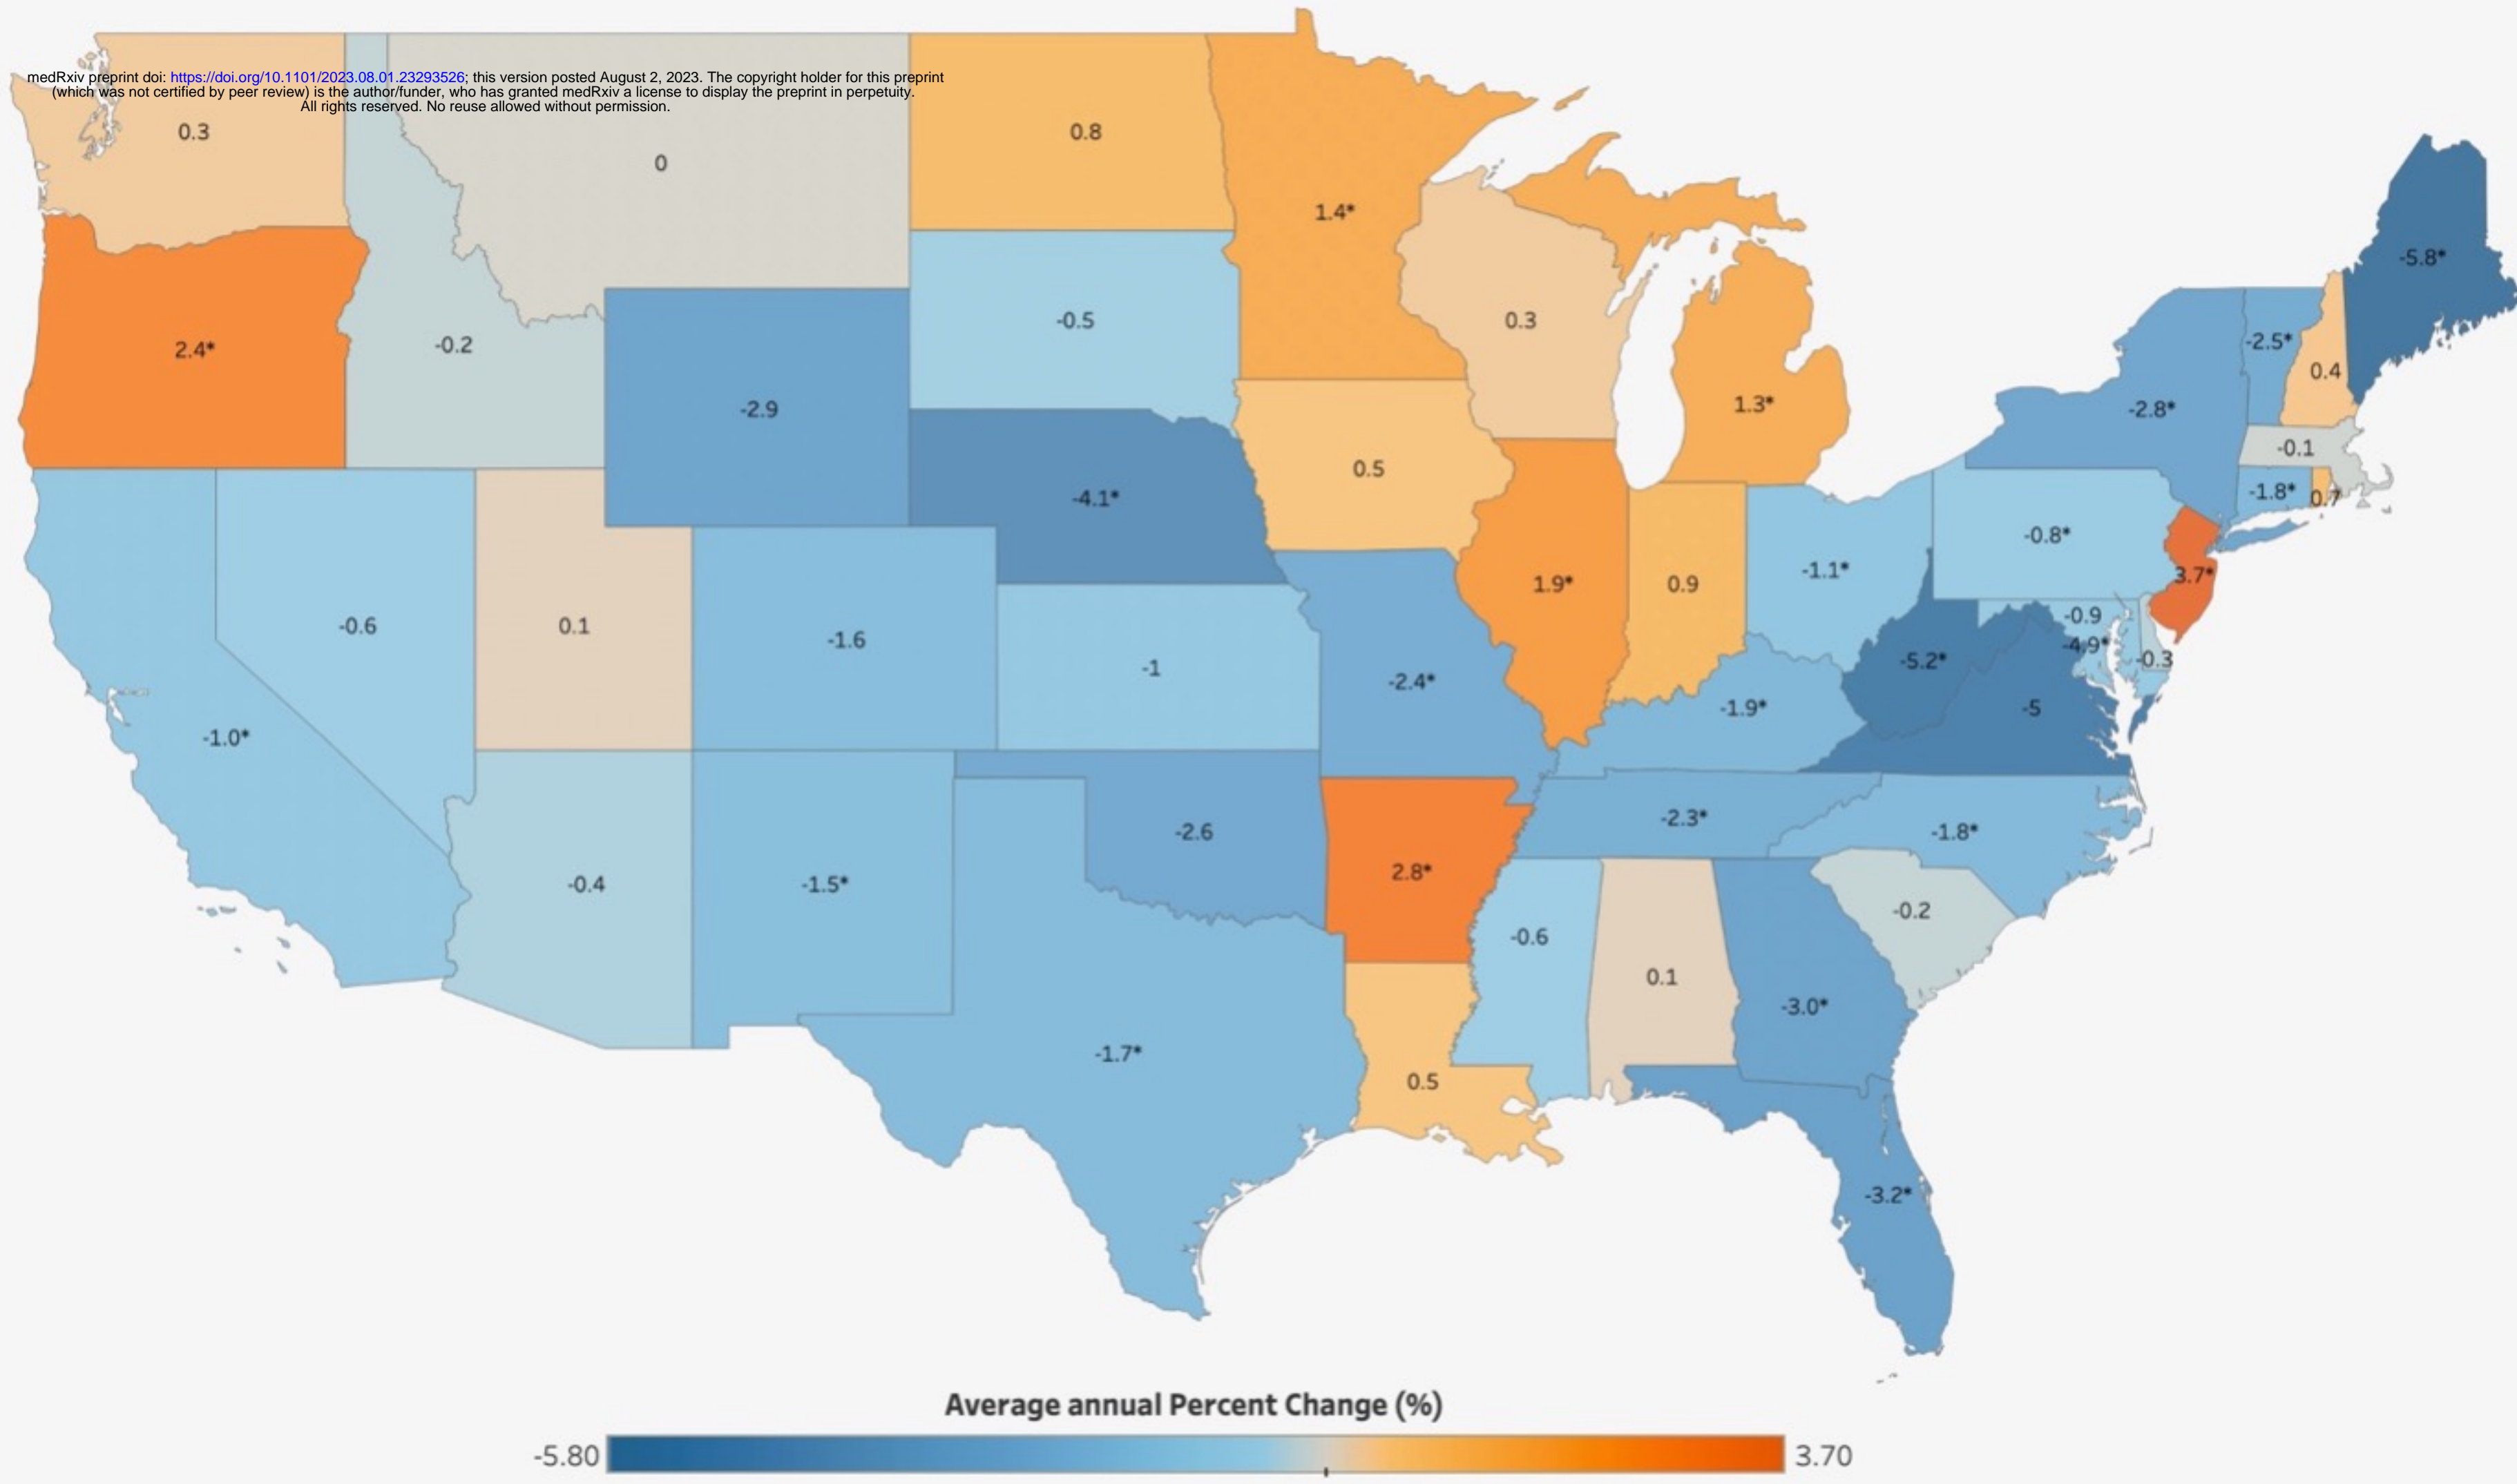

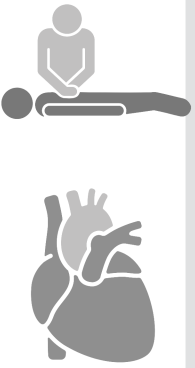

# Trends in cardiac-arrest-related mortality in the US, 1999-2020

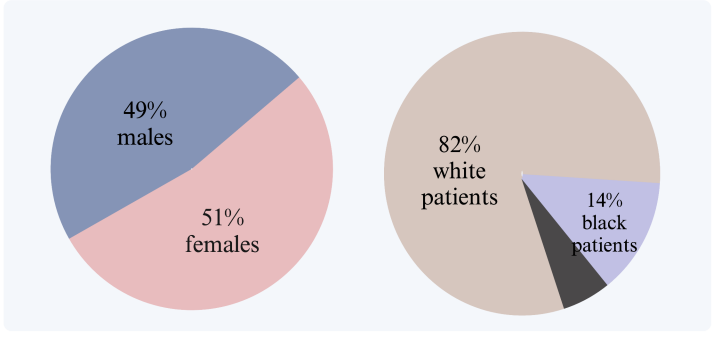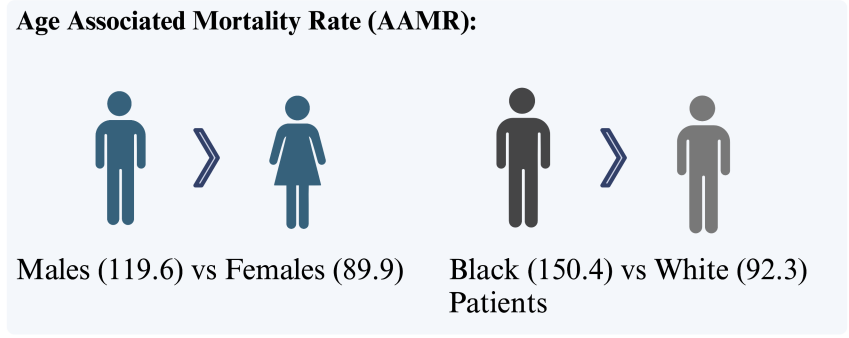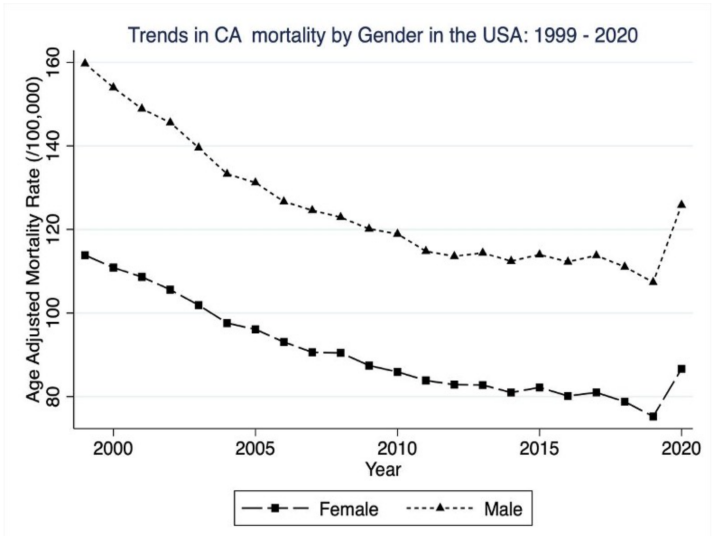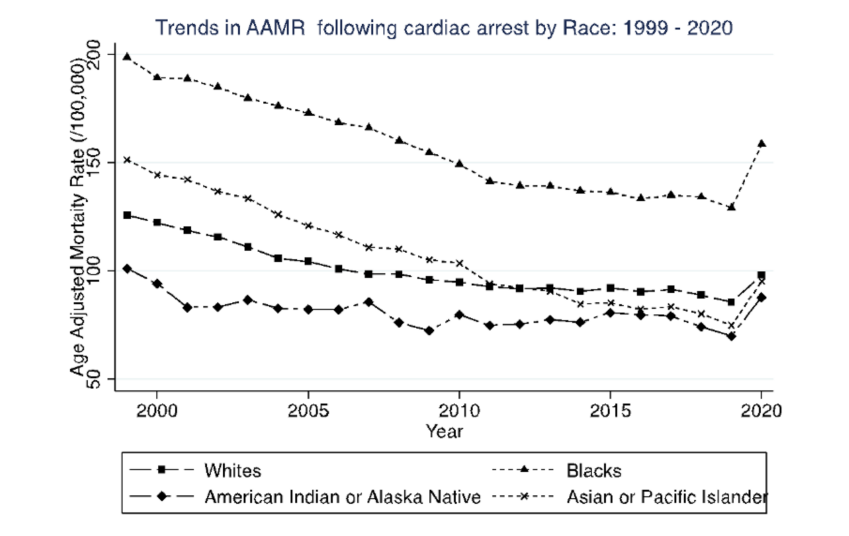

Map showing state level age adjusted mortality rates following cardiac arrest in the USA: 1999 - 2020

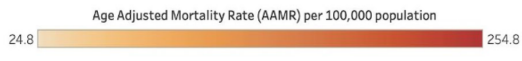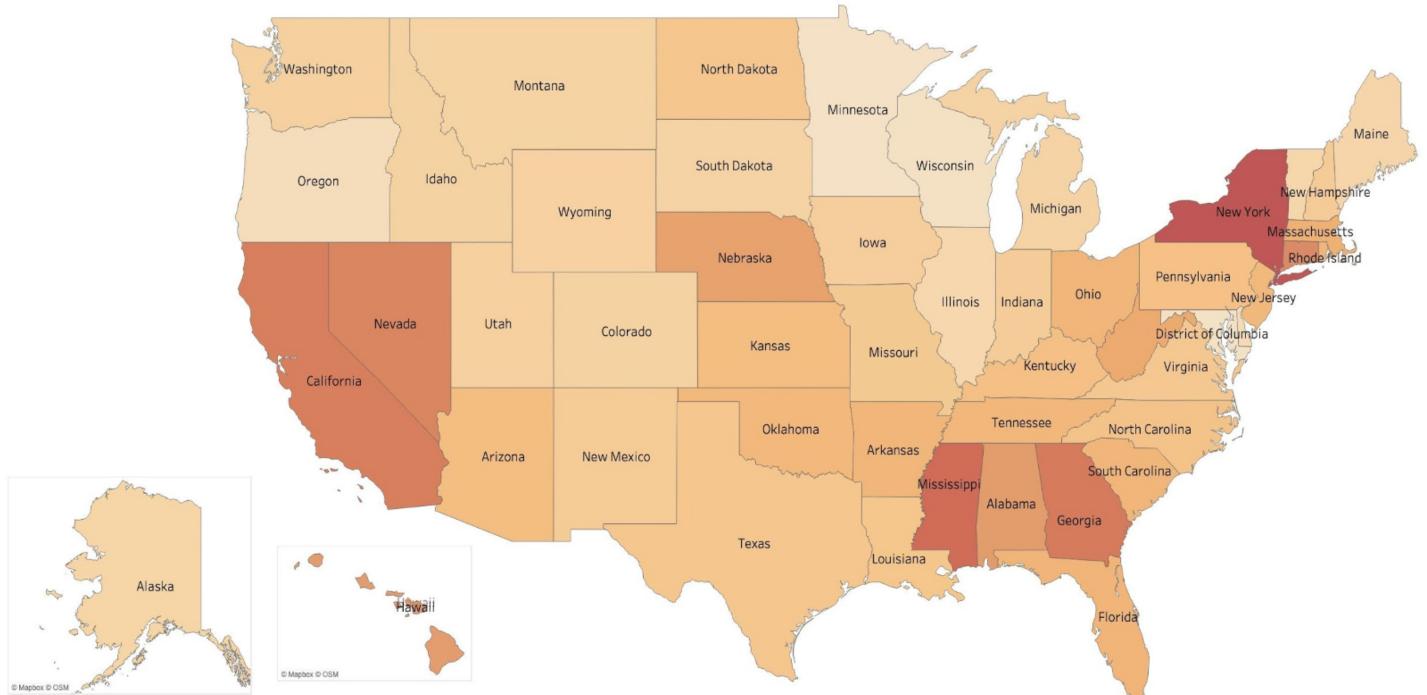

1999

2000  
2001  
2002  
2003  
2004  
2005  
2006  
2007  
2008  
2009  
2010  
2011  
2012  
2013  
2014  
2015  
2016  
2017  
2018  
2019

2020
